# Supplementary material for: Primary cilia formation requires the Leigh syndrome–associated mitochondrial protein NDUFAF2
Source: PubMed Central journal article supplement (PMC11213510; doi:10.1172/jci175560), 2024-07-01

Fig.1a

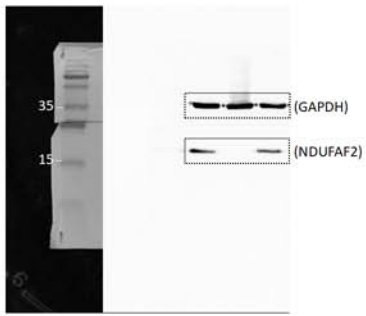

Fig.2a

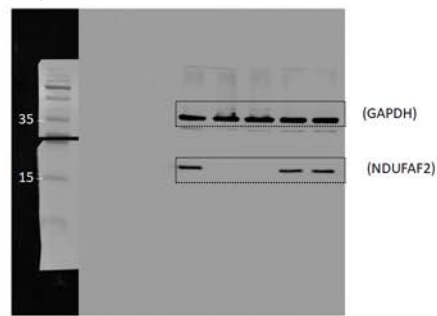

Fig.3a

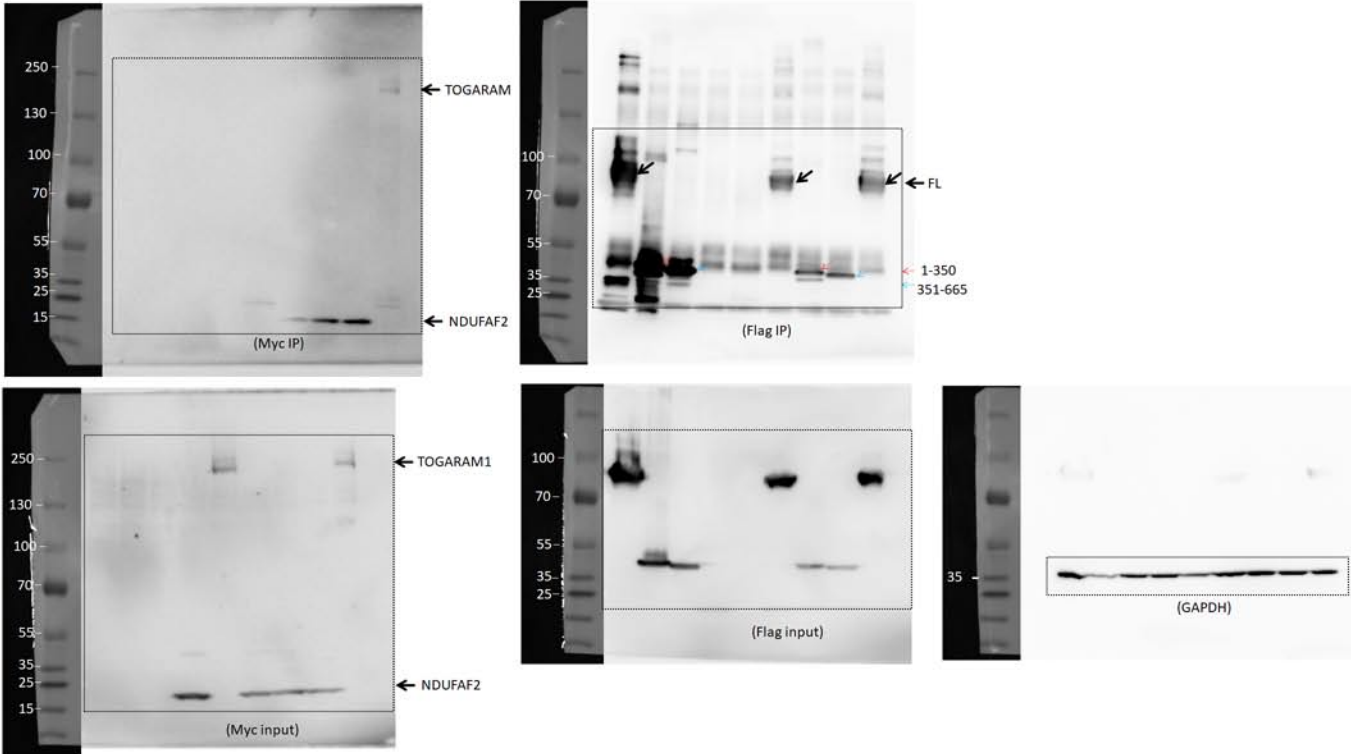

Fig.3b

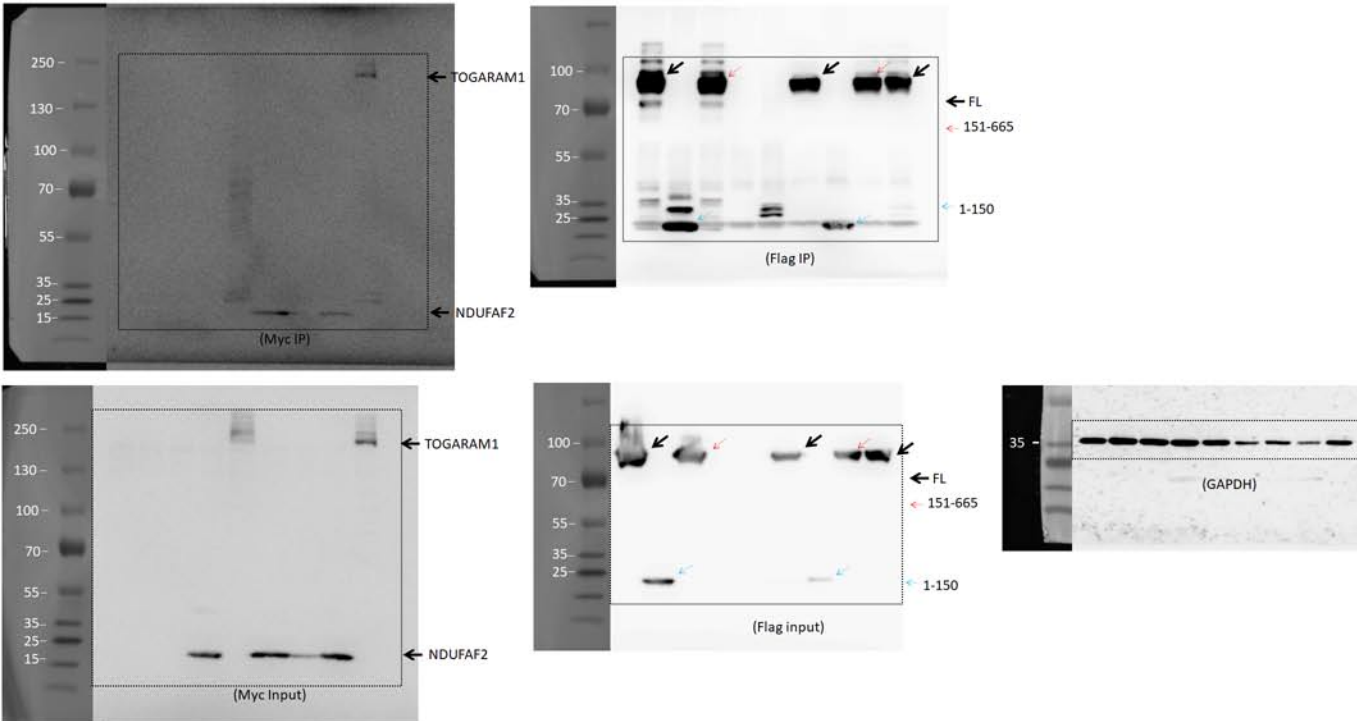

Fig.4b

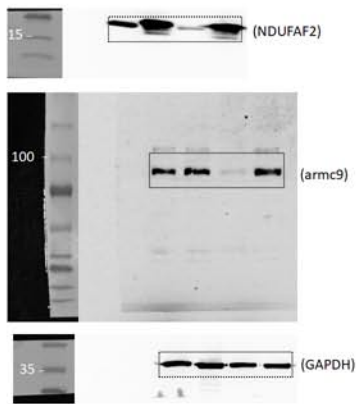

Sup Fig.3e

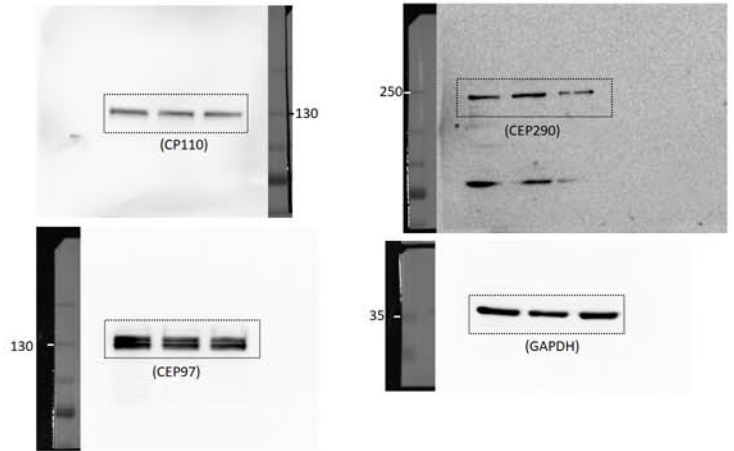

Sup Fig.11a

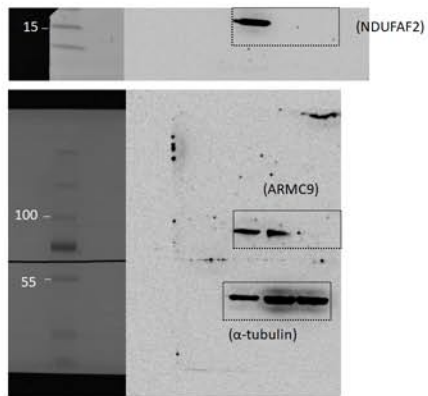

Sup Fig.12a

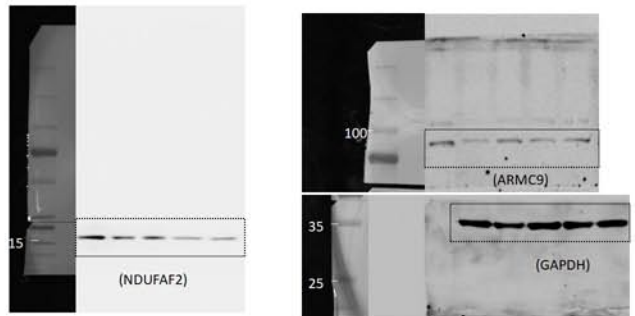

Supplement: jci-134-175560-s177.pdf [file jci-134-175560-s177.pdf]
